# Supplementary material
Source: PubMed Central journal article supplement (PMC6838956)

## **Supplemental Information**

### **Short-Term Local Expression of a PD-L1 Blocking**

### **Antibody from a Self-Replicating RNA Vector**

### **Induces Potent Antitumor Responses**

**Maria Cristina Ballesteros-Briones, Eva Martisova, Erkuden Casales, Noelia Silva-Pilipich, Maria Buñuales, Javier Galindo, Uxua Mancheño, Marta Gorraiz, Juan J. Lasarte, Grazyna Kochan, David Escors, Alfonso R. Sanchez-Paulete, Ignacio Melero, Jesus Prieto, Ruben Hernandez-Alcoceba, Sandra Hervas-Stubbs, and Cristian Smerdou**

# 1 **Supplementary Materials and methods**

2

## 3 **Determination of anti-PD-L1 mAb sequence**

4 We first determined the sequences coding for the variable regions of the heavy (HC) and light  
5 chain (LC) genes of the anti-PD-L1 mAb produced by hybridoma 10B5, derived from an  
6 Armenian hamster immunized with murine PD-L1. <sup>1</sup> Due to the scarce information available  
7 for hamster immunoglobulin sequences, we first purified the mAb from the hybridoma  
8 supernatant using a protein G-Sepharose column (GE Healthcare Bio-Sciences, Pittsburgh,  
9 PA). The purified anti-PD-L1 mAb was digested with trypsin and protein identification was  
10 obtained by analysis of the digests in a coupled liquid chromatography and then analyzed by  
11 tandem mass spectrometry (LC-MS/MS). This analysis allowed the identification of specific  
12 peptides from the constant regions of HC (NH<sub>2</sub>-EDTAMYYCAR-COOH) and LC (NH<sub>2</sub>-  
13 PPSPEELR-COOH) whose sequences were identical to those of available Armenian hamster  
14 mAb sequences. <sup>2-3</sup> With this information, specific oligonucleotides were designed for the  
15 anti-PD-L1 mAb HC and LC sequences that allowed to reverse transcribe and amplify their  
16 mRNAs. Briefly, total RNA was purified from 10B5 hybridoma using the RNeasy kit  
17 (Qiagen) and the 5' end of HC and LC mRNAs were reversed transcribed using reverse sense  
18 oligonucleotides (for HC: 5'-TCTTGCACAGTAGTACATGG-3' and for LC: 5'-  
19 CCGGAGCTCCTCAGGTGAAG-3') and amplified by PCR using the 5' RACE System for  
20 Rapid Amplification of cDNA Ends (ThermoFisher, Waltham, MA). Since the peptide  
21 identified for HC was in a conserved area within the variable region, the 3' end of its mRNA  
22 was also amplified by reverse transcribing total mRNA with a poly-dT oligonucleotide and  
23 performing a PCR with the specific forward primer 5'- GAGGACACAGCCATGTACTAC-  
24 3', which sequence was based on the identified HC peptide. In each case, amplified DNA  
25 fragments from at least three independent PCR reactions were sequenced, allowing to

26 determine the nucleotide and amino acid sequences of the variable regions of the anti-PD-L1  
27 LC and HC chains (see next part).

28

### 29 **Construction of AAV and SFV vectors expressing anti PD-L1 mAb**

30 A synthetic anti-PD-L1 codon-optimized sequence containing the mAb variable regions  
31 described in the previous part and mouse IgG2a and lambda2 constant regions, for HC and  
32 LC chains, respectively, was obtained from GenScript (Nanjing, China) cloned in pUC57  
33 flanked by EcoR V sites (pU57-aPDL1). The HC and LC amino acid sequences encoded in  
34 this plasmid are the following:

35 HC:       NH<sub>2</sub>-MNWGLKLVFFVLILKGVQCEVQLVESGGGLEQPGKSLKLSCEAS-  
36 **GFTFSDYYMSWVRQAPGKGLEWVAYISSGSSNIKYVDVVKGRVTISRDNANKLL**  
37 **SLQMNNLKSEDTAMYWCARGGYALDFWGQGTQVTVSSAKTTPPSVYPLAPGSAAQ**  
38 *TNSMVTLGCLVKGYFPEPVTVTWNSGSLSSGVHTFPAVLQSDLYTLSSSVTVPSSTWPSETV*  
39 *TCNVAHPASSTKVDKKIVPRDCGCKPCICTVPEVSSVFIFPPKPKDVLITLTPKVTCTVVVDI*  
40 *SKDDPEVQFSWFVDDVEVHTAQTQPREEQFNSTFRSVSELPIMHQDWLNGKEFKCRVNS*  
41 *AAFPAPIEKTISKTKGRPKAPQVYTIPPPKEQMAKDKVSLTCMITDFFPEDITVEWQWNGQ*  
42 *PAENYKNTQPIMDTDGSYFVYSKLVNQLKSNWEAGNTFTCSVLHEGLHNNHTEKSLSHSPG*  
43 *K-COOH*

44 LC:       NH<sub>2</sub>-AWIPLLLLFFHCTGSFSQPLLTQSPSASASLGNSVKITCTLSSQHSTY-  
45 **GIRWYQQHPDKAPKYVMFVTSDGSHGKGDGIPDRFSGSSSGAHRYLSISNIQSED**  
46 **EADYYCGTGDSTGFVFGSGTQLTVLGQPKSTPTLTVFPPSSEELKENKATLVCLISNFS**  
47 *PSGVTVAWKANGTPITQGVDTSNPTKEGNKFMASFLHLTSDQWRSHNSFTCQVTHEGDT*  
48 *VEKSLSPAECCL-COOH*

49 The variable regions of each antiPD-L1 mAb chain are indicated in bold with their signal  
50 peptides underlined, while the murine-derived constant regions are indicated in italics.

51 Plasmid pU57-aPDL1 contained the HC and LC mAb sequences fused by the sequence of 2A  
52 autoprotease from foot-and-mouth disease virus (2A), including a furin cleaving site at the  
53 carboxyl terminus of the HC, a strategy described earlier for efficient antibody expression <sup>4</sup>  
54 (Fig. 1A).

55 To generate the AAV-aPDL1 plasmid (pAAV-aPDL1), a DNA fragment containing anti-  
56 PDL1 mAb sequence was obtained by EcoR V digestion from pUC57-aPDL1 and subcloned  
57 under the control of human elongation factor 1 alpha (EF1 $\alpha$ ) promoter into AAV2 DNA  
58 backbone using a pAAV2 plasmid (Agilent Technologies, Sant Clara, CA).

59 To generate the SFV-aPDL1 vector the anti-PD-L1 mAb sequence was first amplified by  
60 PCR from pAAV-aPDL1 with the following primers: Forward:  
61 5'GAGCGGGCCCAATTGGGGACTGAAACTCG3' and Reverse: 5'GAGCGGGCCCCTA  
62 GAGACATTCTGCTGG3'. These primers contained an Apa I site (underlined) which  
63 allowed subcloning of the PCR fragment into the Apa I site into pSFVb1-2A <sup>5</sup> in frame with  
64 the minimal SFV capsid translation enhancer (b1), using the 2A autoprotease as a linker.  
65 Plasmid pSFV-LacZ has been described previously. <sup>6</sup>

66

### 67 **Analysis of protein expression by Western Blot**

68 BHK-21 cells were transfected with pAAV-aPDL1 or infected with SFV-aPDL1 (the  
69 infectivity of AAV *in vitro* is very inefficient, so the expression of the mAb was analyzed by  
70 transfecting the plasmid containing the vector). For transfection, BHK cells were cultured in  
71 6-well plates and incubated with 300  $\mu$ l of Optimem medium (Invitrogen) containing 2  $\mu$ g of  
72 pAAV-aPDL1 and 5  $\mu$ l of lipofectamine 2000 (Invitrogen). For infection, confluent BHK  
73 cells monolayers were incubated with SFV VPs at a multiplicity of infection of 10 and diluted  
74 in 300  $\mu$ l of MEM medium (Gibco BRL, UK) containing 0.2% bovine serum albumin, 2 mM  
75 glutamine and 20 mM Hepes. In both cases (transfection and infection), medium was

76 removed after 1 h at 37° and cells were incubated for 24h at 37°C with CHO medium without  
77 FBS (Sigma, St. Louis, MO). Supernatants were analysed by Western blot under reducing  
78 (with dithiothreitol, DTT) and non-reducing (without DTT) conditions in 12% or 8%  
79 polyacrylamide gels, respectively. Anti-PD-L1 mAb was visualized by incubating with a  
80 polyclonal goat antibody specific for mouse IgG conjugated with peroxidase (Sigma).

81

## 82 **Analysis of mRNA in tumors by RT-qPCR**

83 Tumors were extracted 17h after treatment, homogenized at 4°C, and total RNA was purified  
84 using Maxwell® RSC simplyRNA Cells Kit (Promega, Madison, WI), according to the  
85 manufacturer's instructions. DNase I-treated RNA was retrotranscribed to cDNA using  
86 random primers (Promega) with M-MLV reverse transcriptase in the presence of RNase OUT  
87 (Invitrogen, Carlsbad, CA). For quantitative PCR, cDNAs were amplified using iQ SYBR ®  
88 Green Supermix in a C1000 thermal cycler according to the manufacturer's instructions (Bio-  
89 Rad, Hercules, CA). cDNAs were amplified with oligonucleotides specific for the following  
90 mouse genes: GAPDH (forward: 5'-TGCACCACCAACTGCTTA-3'; reverse: 5'-  
91 CAGAAGACTGTGGATGGCCCCTC-3'), 2'-5'-oligoadenylate synthetase 2 (forward: 5'-  
92 ACTGTCTGAAGCAGATTGCG-3'; reverse: 5'-TGGAAGTGTGGGAAGCAGTC-3'),  
93 TRIM-21 (forward: 5'-GCTTCACCTATTCTGTGAGG-3' ; reverse: 5'-  
94 ATCCATTTCCATCTTCTCGG-3'), STAT-I (forward: 5'-TCATCAGTCACCAAGAGAGG  
95 -3' ; reverse: 5'- ATCATTCCAGAGGCACAG -3'), Mx1 (forward: 5'-  
96 ATCTGTGCAGGCACTATGAG-3' ; reverse: 5'- CCTTCCTTCTTTACGCTTCC-3'), and  
97 for SFV replicase (forward: 5'-CTGTTCTCGACGCGTCGTC-3' ; reverse: 5'-  
98 GAGGTGTTTCCACGACCC-3'). Relative levels for each RNA were determined with  
99 following formula:  $2^{\Delta Ct}$  where  $\Delta Ct = Ct (GAPDH) - Ct (gene\ of\ interest)$ .

100

101 **Analysis of PD-L1 expression *in vitro***

102 MC38 and B16-OVA cells were plated in 12-well plates ( $5 \times 10^4$  cells/well) and cultured as  
103 described during 6h. Then, medium was replaced by new medium containing 100 units/ml of  
104 murine IFN $\gamma$  (Miltenyi, Germany) and incubated for 48h. At that time, cells were collected  
105 using diluted trypsin (1:4) and analyzed by flow cytometry as described, using PE-conjugated  
106 anti-mouse PD-L1 antibody (Biolegend, clone 10F.9G2).

107

108 **Supplementary Figure legends**

109

110 **Supplementary Figure S1. Evaluation of antitumor efficacy of SFV-aPDL1 in mice with**  
111 **two MC38 subcutaneous tumors.** C57BL/6 mice were inoculated subcutaneously with  
112  $5 \times 10^5$  and  $3 \times 10^5$  MC38 cells in the lateral and contralateral flanks, respectively.  
113 Approximately seven days later (day 0), animals received one intratumoral dose of SFV-  
114 aPDL1 ( $3 \times 10^8$  VPs) or saline in the lateral tumor (treated), while the contralateral tumor was  
115 left untreated. **A**, Evolution of tumor size. Data represent the mean tumor size ( $\text{mm}^2$ ) + SEM.  
116 **B**, Survival after treatment. \*,  $p < 0.05$ ; \*\*\*,  $p < 0.001$ ; \*\*\*\*,  $p < 0.0001$ .

117

118 **Supplementary Figure S2. Evaluation of the antitumor effect of SFV-aPDL1 in C57BL/6**  
119 **mice carrying subcutaneous B16-OVA tumors.**  $5 \times 10^5$  B16/OVA cells were inoculated  
120 subcutaneously into the right flank of C57BL/6 mice and six days later, when tumors had an  
121 average diameter of 4-5 mm, animals received one intratumoral dose of  $3 \times 10^8$  VPs of the  
122 indicated SFV-derived vectors or an equivalent volume of saline. **A**, Evaluation of tumor size  
123 ( $\text{mm}^2$ ) for each individual mouse. The fractions in the right corner of each graph indicate the  
124 number of complete regressions/total number of mice for each group. **B**, Mean tumor size  
125 evolution + SEM. Data are represented only until day 7 since saline mice had to sacrificed at

126 this time point due to tumor size or ulceration. **C**, Survival after treatment. \*\*\*,  $p < 0.001$ ;  
127 \*\*\*\*,  $p < 0.0001$ , ns not significant.

128

129 **Supplementary Figure S3. Evaluation of SFV-LacZ in combination with anti-PDL1**  
130 **mAb given IP.** C57BL/6 mice bearing subcutaneous tumors were inoculated with SFV-LacZ  
131 ( $3 \times 10^8$  VPs) IT, with anti-PDL1 mAb (BioXcell. Clon 10F.9G2) given IP as described in Fig.  
132 3, or with a combination of both agents. Mice treated with saline were used as negative  
133 control. **A**, Evolution of tumor size ( $\text{mm}^2$ ) along time for each individual mouse. The  
134 fractions in the right lower corner of each graph indicate the number of complete  
135 regressions/total number of mice in each group. Dashed lines indicate the times of mAb  
136 administrations. **B**, Mean tumor size evolution  $\pm$  SEM. **C**, Survival after treatment. +,  $p=0.07$ ,  
137 \*,  $p < 0.05$ ; \*\*,  $p < 0.01$ ; \*\*\*,  $p < 0.001$ \*\*\*\*,  $p < 0.0001$ ; ns, not significant.

138

139 **Supplementary Figure S4. Analysis of PD-L1 expression in tumor cells.** (A) MC38 and  
140 B16-OVA cells were cultured in presence or absence of 100 units/ml of murine  $\text{IFN}\gamma$ ,  
141 incubated for 48h and analyzed by flow cytometry with anti-mouse PD-L1 antibody ( $n=3$ ).  
142 (B) C57BL/6 mice bearing subcutaneous MC38 or B16-OVA tumors ( $n=4-6$ ) were inoculated  
143 with the indicated vectors or saline as described in Fig. 5. Five days after treatment tumors  
144 were excised, digested and cells were stained for surface marker PD-L1 and analysed by flow  
145 cytometry. PD-L1 levels were evaluated in total CD45-negative cells (tumor cells).  
146 Histograms to the left of each graph show the expression of PD-L1 on tumor cells as observed  
147 in one representative well per condition. \*\*,  $p < 0.01$ ; \*\*\*\*,  $p < 0.0001$ ; ns, not significant.

148

149 **Supplementary Figure S5. Analysis of CD62L in tumor CD8 T cells.** C57BL/6 mice  
150 bearing subcutaneous MC38 (A) or B16-OVA (B) tumors were inoculated with the indicated

151 vectors or PBS as described in Fig. 5 (MC38) and 7 (B16-OVA). Five days after treatment  
152 tumors were excised, digested and freshly purified lymphocytes were stained for surface  
153 marker CD62L and analysed by flow cytometry. CD62L levels were evaluated in total CD8 T  
154 cells (left graphs) and tumor-specific CD8 T cells (Tetr<sup>+</sup>) (right graphs). Data represent mean  
155  $\pm$  SEM (n=6). Asterisks above each bar indicate the statistical comparison of each group with  
156 control saline group. Other comparisons are indicated by horizontal bars. \*, p<0.05; \*\*,  
157 p<0.01, ns, not significant.

158

159 **Supplementary Figure S6. Analysis of additional co-stimulatory and co-inhibitory**  
160 **immunological markers in MC38 tumor T cells.** Freshly purified lymphocytes were  
161 collected from tumors as described in Fig. 5 and analysed by flow cytometry with antibodies  
162 specific for the immunological co-stimulatory marker ICOS (A), and for immunological co-  
163 inhibitory markers TIM3 (B) and 2B4 (C). Data show levels of each marker in total CD8 cells  
164 (left graphs), MC38-specific CD8 T cells (central graphs), and total CD4 T cells (right  
165 graphs). Asterisks above bars indicate the statistical comparison of each group with control  
166 saline group. Other comparisons are indicated by horizontal bars. \*, p<0.05; ns, not  
167 significant.

168

169 **Supplementary Figure S7. Analyses of co-stimulatory and co-inhibitory immunological**  
170 **markers on B16-OVA tumor T cells.** Tumor-infiltrating lymphocytes obtained as described  
171 in Fig. 7 were analyzed by flow cytometry with antibodies specific for the immunological co-  
172 inhibitory markers PD-1 (A), LAG3 (B), and co-stimulatory marker CD137 (C). Data show  
173 levels (mean  $\pm$  SEM, n=6) of each marker in total CD8 T cells (left graphs), tumor-specific  
174 CD8 T cells (B16-Tetr<sup>+</sup>, central graphs), and total CD4 T cells (right graphs). Asterisks above



175 each bar indicate the statistical comparison of each group with control saline group. Other  
176 comparisons are indicated by horizontal bars. \*,  $p < 0.05$ ; ns, not significant.

177

178 **Supplementary Figure S8. Analysis of CD137 and PD-1 co-expression in MC38 tumors.**

179 Tumor-infiltrating lymphocytes were obtained from non-treated MC38 tumors and analyzed  
180 by flow cytometry with antibodies specific for PD-1 and CD137. (A) The right graph  
181 represents the percentage of double positive PD1+ CD137+ in total or tumor specific CD8  
182 cells (MC38 Tetr+). Dot plots show representative gating strategies for the indicated cells. (B)  
183 Percentage of CD137+ CD8 cells which are PD-1+ or PD-1- (indicated in the X axis). Data  
184 show mean  $\pm$  SEM,  $n=6$ . \*\*\*\*,  $p < 0.0001$ .

185

186 **Supplementary Figure S9. Gating strategy used to identify CD4 and CD8 T cells in the**

187 **tumor microenvironment.** Lymphocytes were gated from CD45+ cells based on FSC and  
188 SSC (A). Next, dead cells were removed from the analysis using Zombi NIR fixable dead cell  
189 stain (B). Doublets were removed from lymphocytes using FSC-A and FSC-H (C). Plot in D  
190 shows CD4+ and CD8+ cell gates and plot in E depict Tetramer+ (Tetr) cells in CD8 TILs.  
191 Plot Titers refer to the gated population exhibited.

192

193 **Supplementary References**

194

- 195 1. Dong H., Strome S.E., Salomao D.R., Tamura H., Hirano F., Flies D.B. *et al.* (2002).  
196 Tumor-associated B7-H1 promotes T-cell apoptosis: a potential mechanism of  
197 immune evasion. *Nat. Med.* 8, 793-800.

- 198 2. Verdino P., Witherden D.A., Podshivalova K., Rieder S.E., Havran W.L., Wilson I.A.  
199 (2011). cDNA sequence and Fab crystal structure of HL4E10, a hamster IgG lambda  
200 light chain antibody stimulatory for gammadelta T cells. PLoS One 6, e19828.
- 201 3. Haggart R., Perera J., Huang H.C. (2013). Cloning of a hamster anti-mouse CD79B  
202 antibody sequences and identification of a new hamster immunoglobulin lambda  
203 constant IGLC gene region. Immunogenetics 65, 473-478.
- 204 4. Fang J., Qian J.J., Yi S., Harding T.C., Tu G.H., VanRoey M. *et al.* (2005). Stable  
205 antibody expression at therapeutic levels using the 2A peptide. Nat. Biotechnol. 23,  
206 584-590.
- 207 5. Rodriguez-Madoz J.R., Prieto J., Smerdou C. (2005). Semliki forest virus vectors  
208 engineered to express higher IL-12 levels induce efficient elimination of murine colon  
209 adenocarcinomas. Mol. Ther. 12, 153-163.
- 210 6. Quetglas J.I., Fioravanti J., Ardaiz N., Medina-Echeverz J., Baraibar I., Prieto J. *et al.*  
211 (2012). A Semliki forest virus vector engineered to express IFNalpha induces efficient  
212 elimination of established tumors. Gene. Ther. 19, 271-278.
- 213
- 214

**A**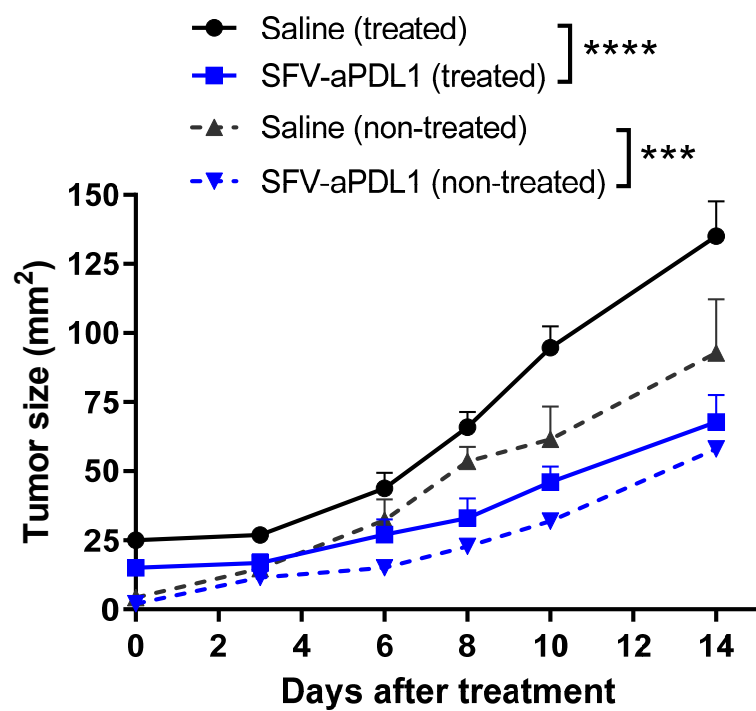**B**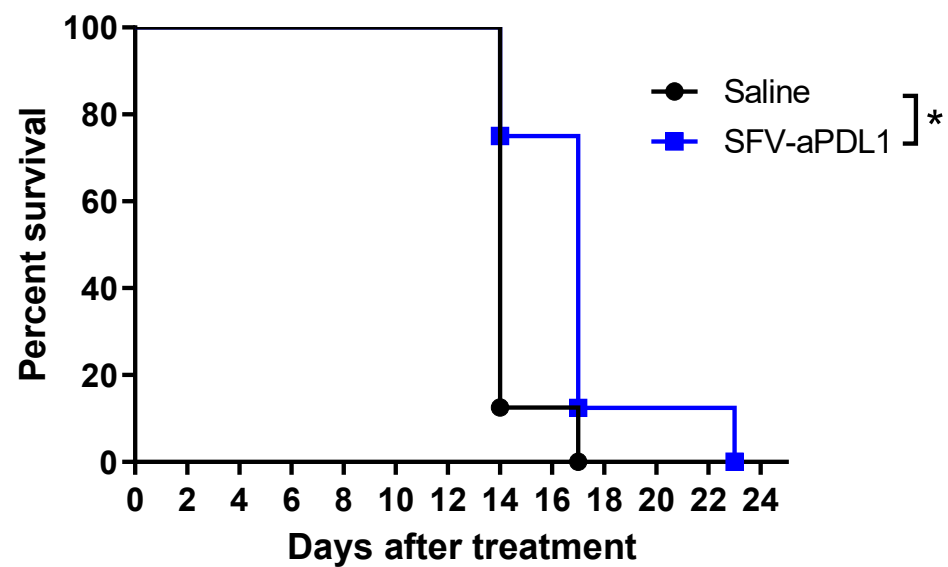

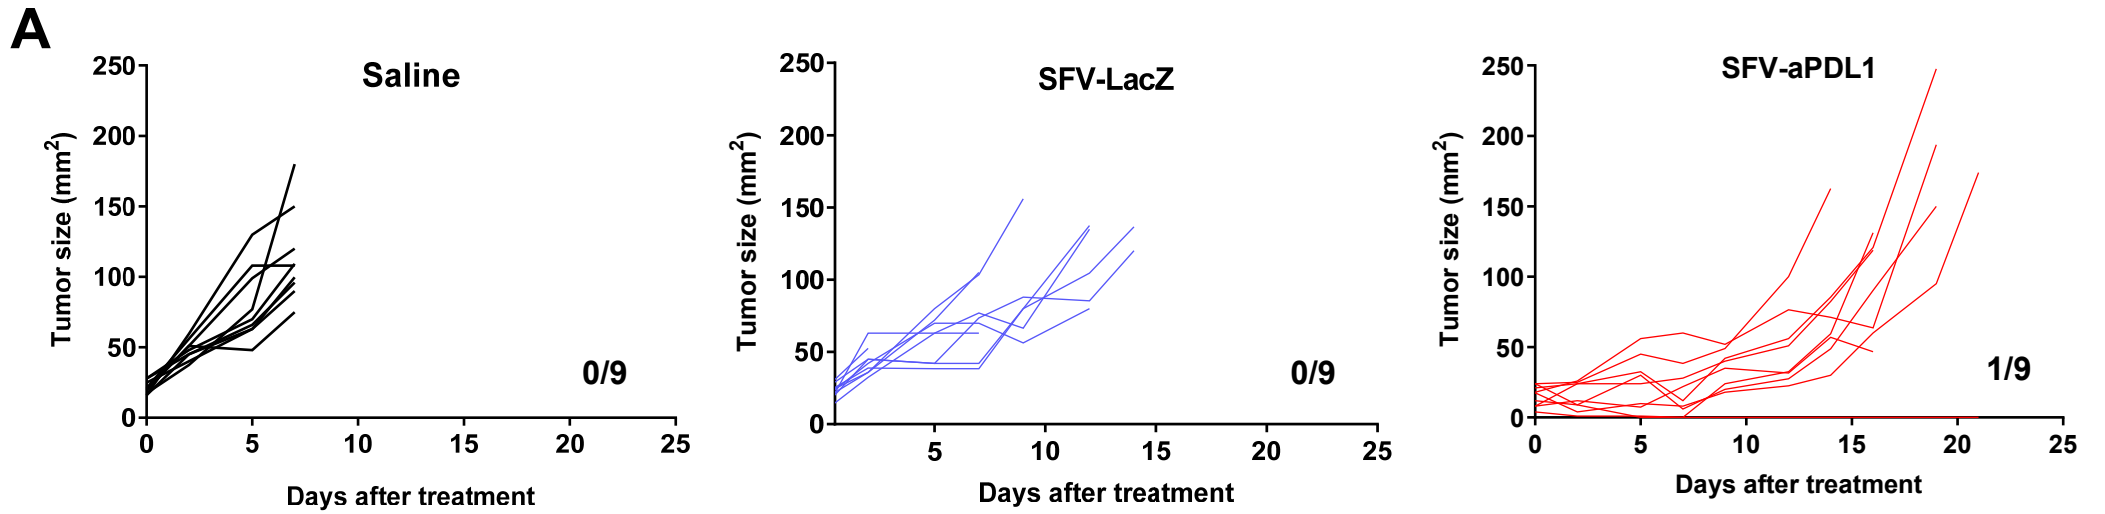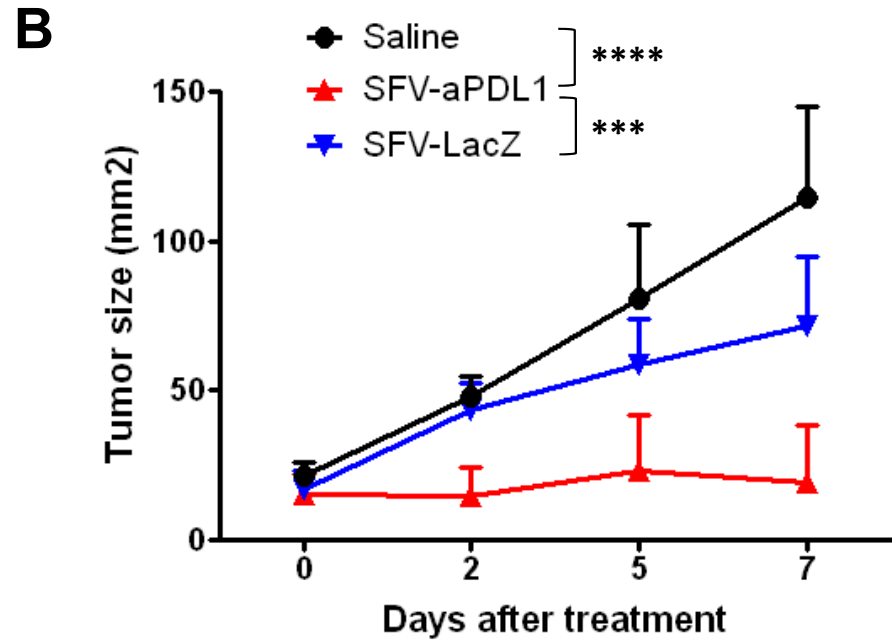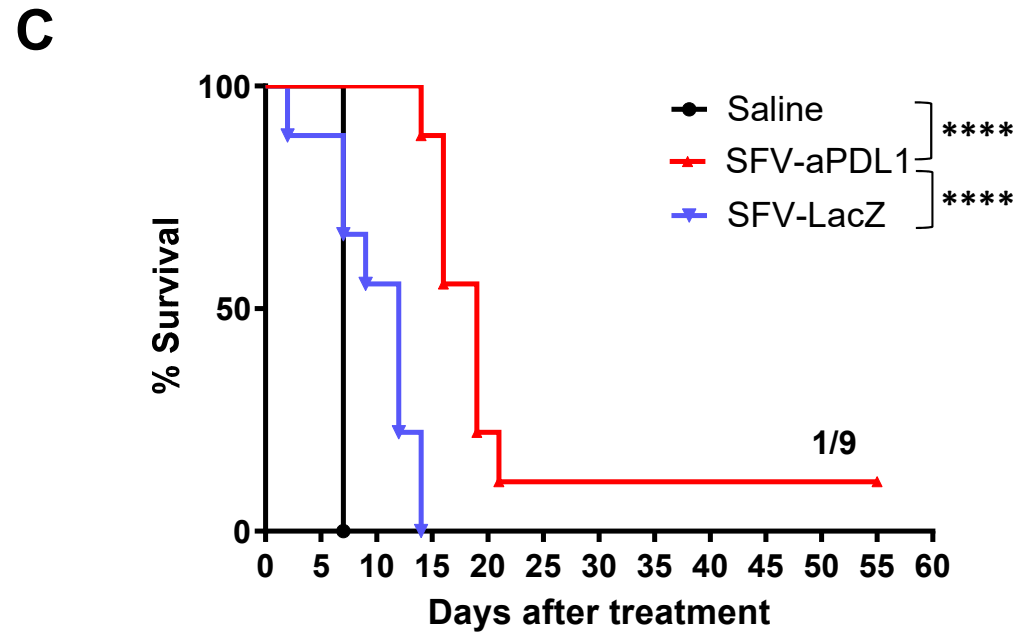

**A**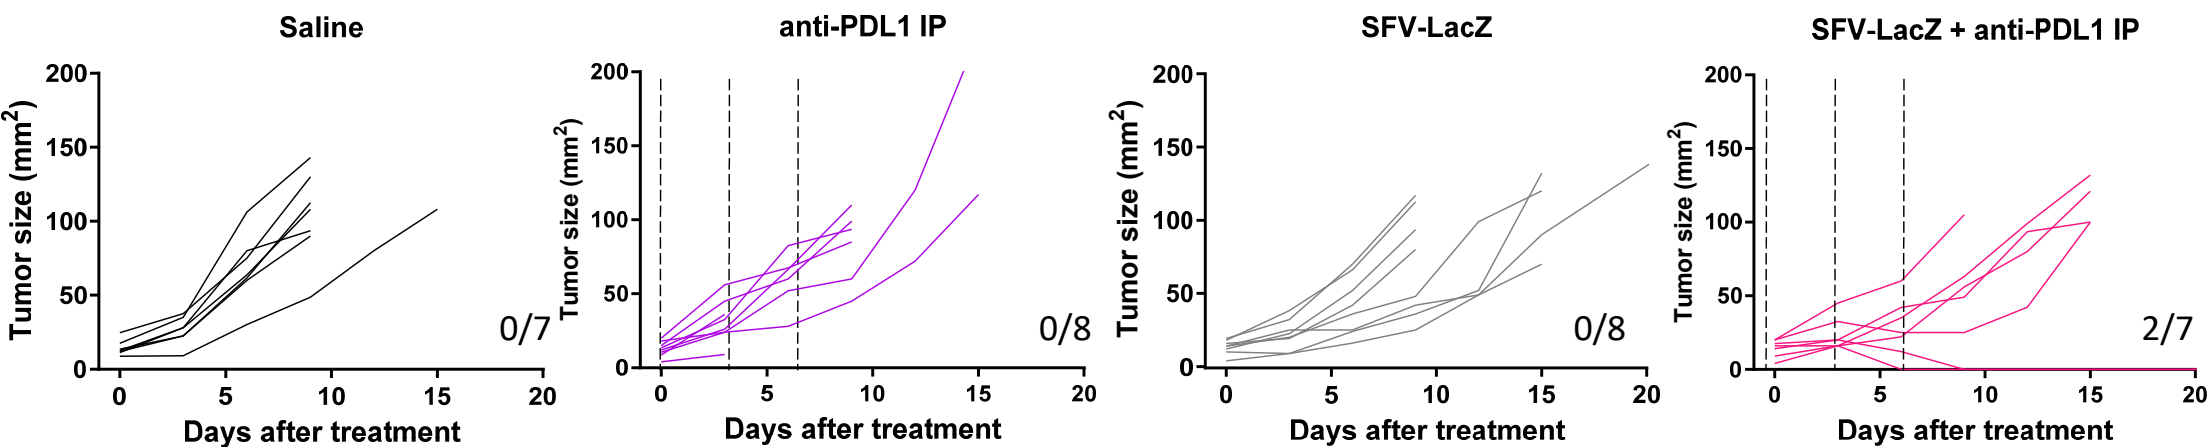**B**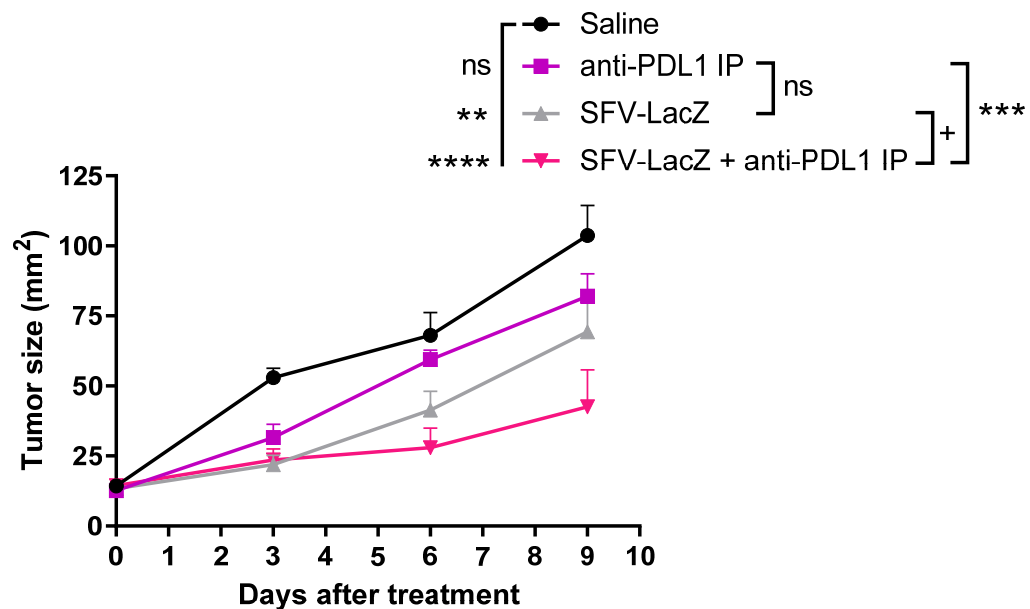**C**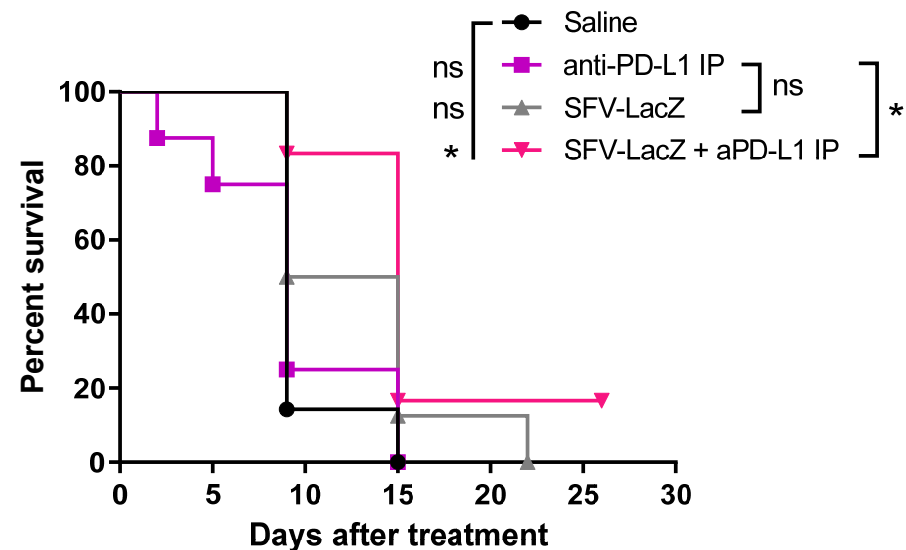

**A**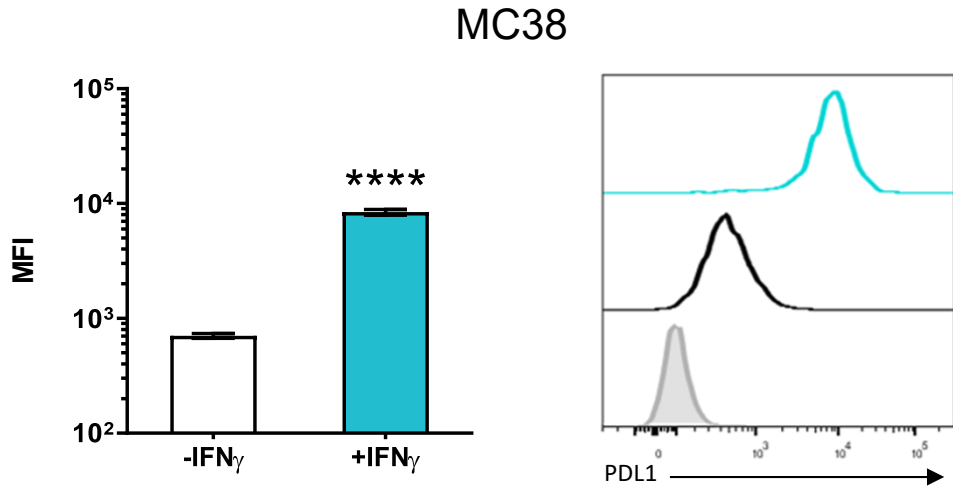**B**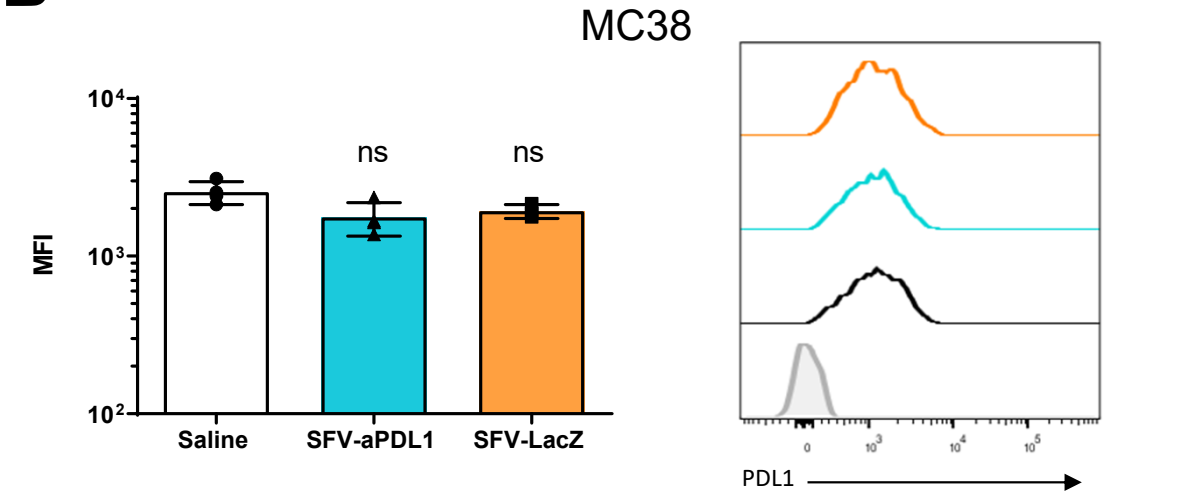

B16-OVA

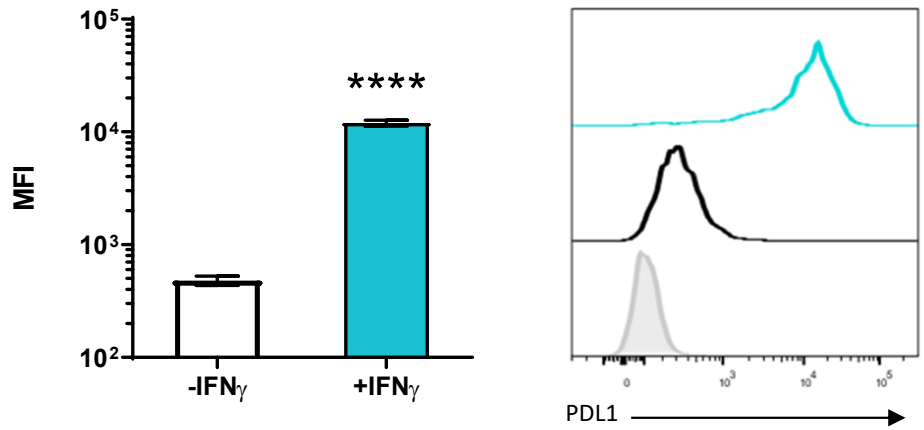

B16-OVA

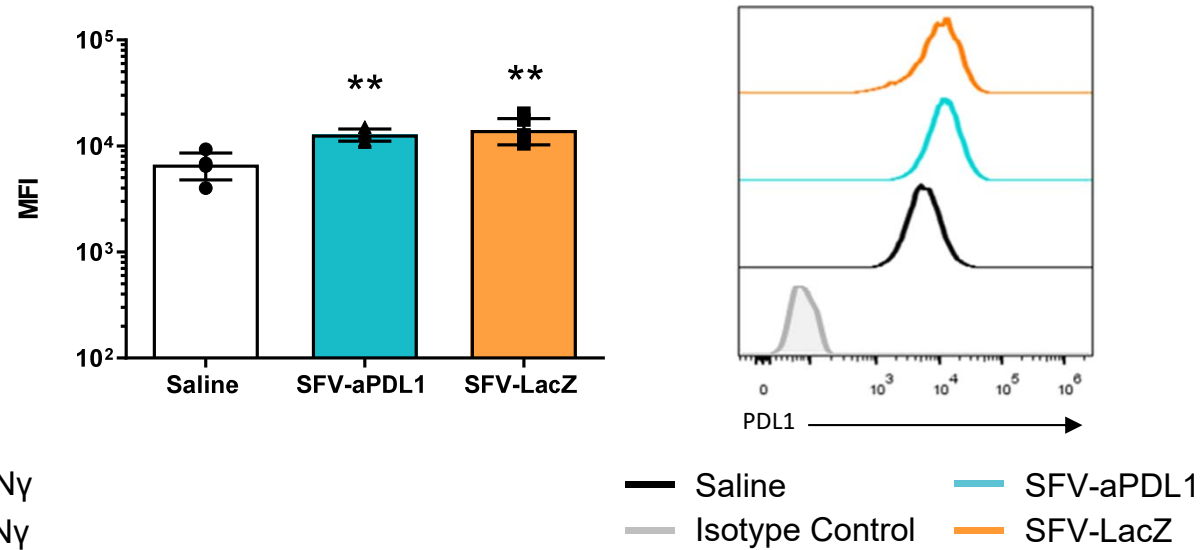

**A**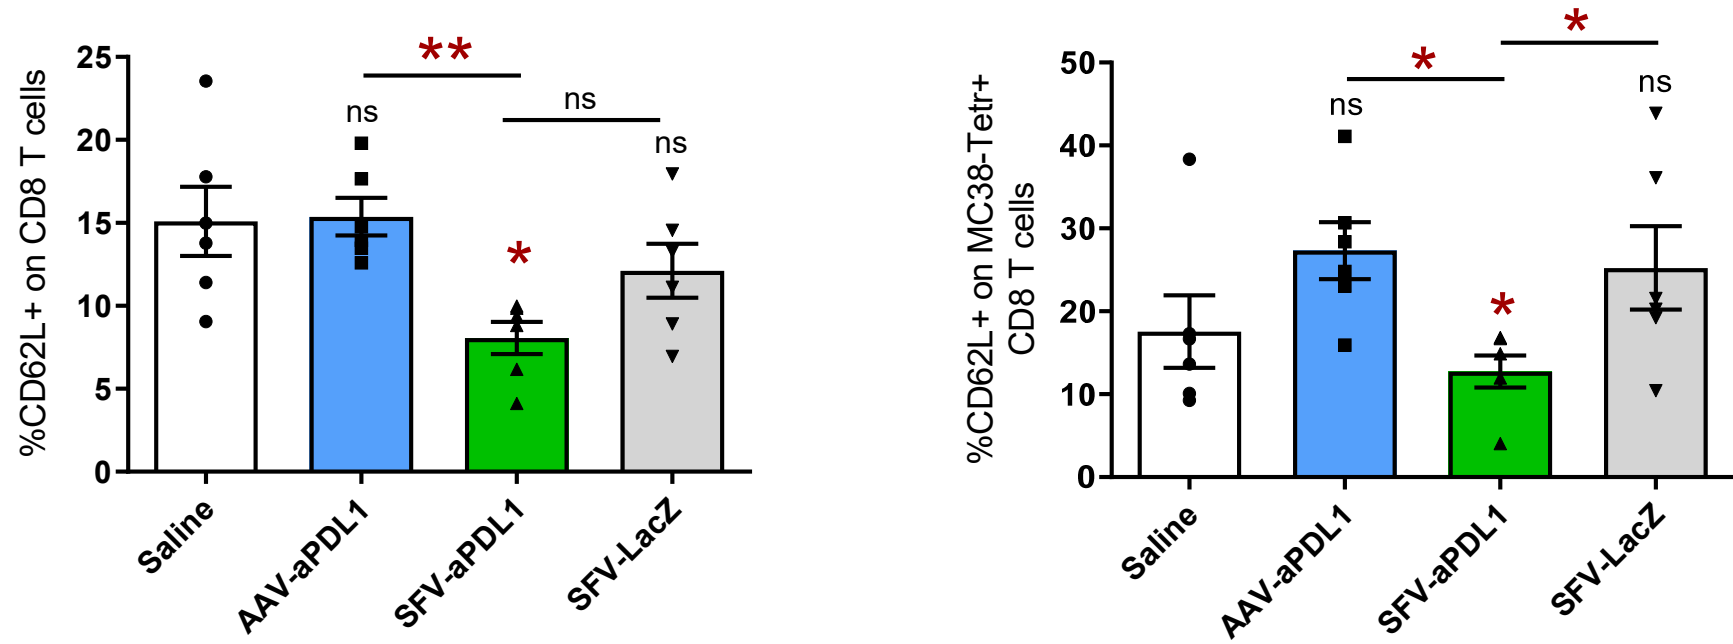**B**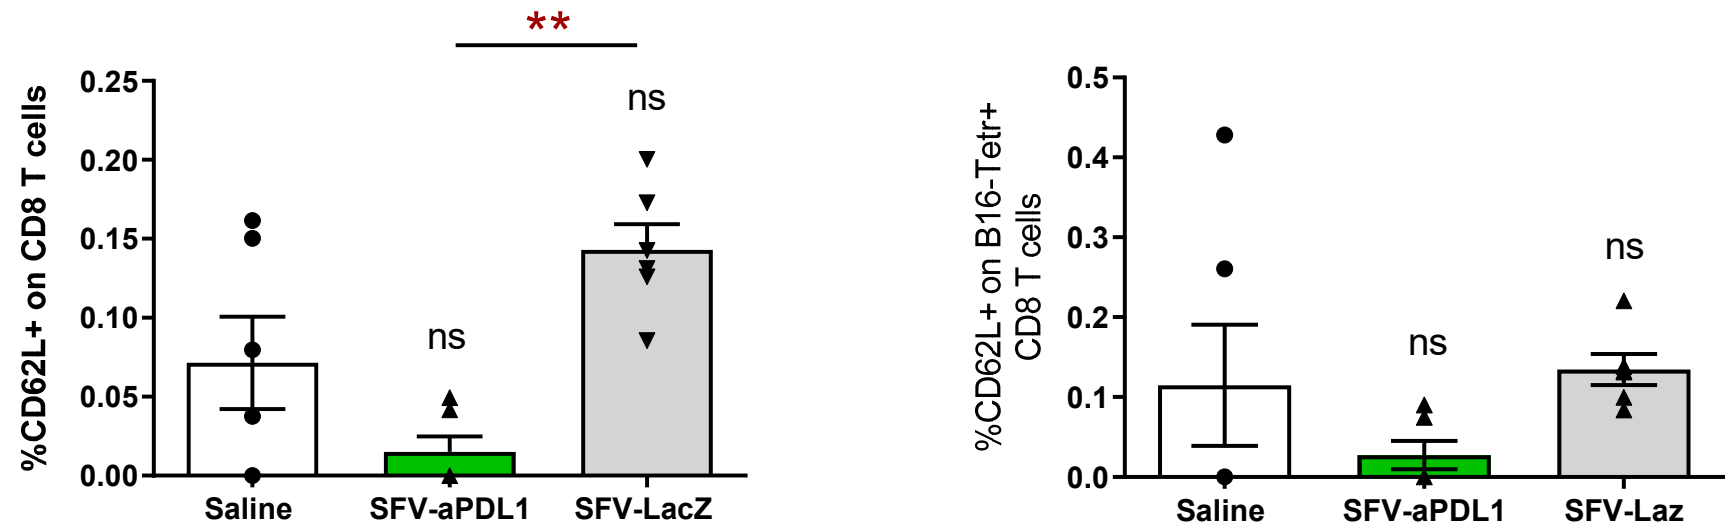

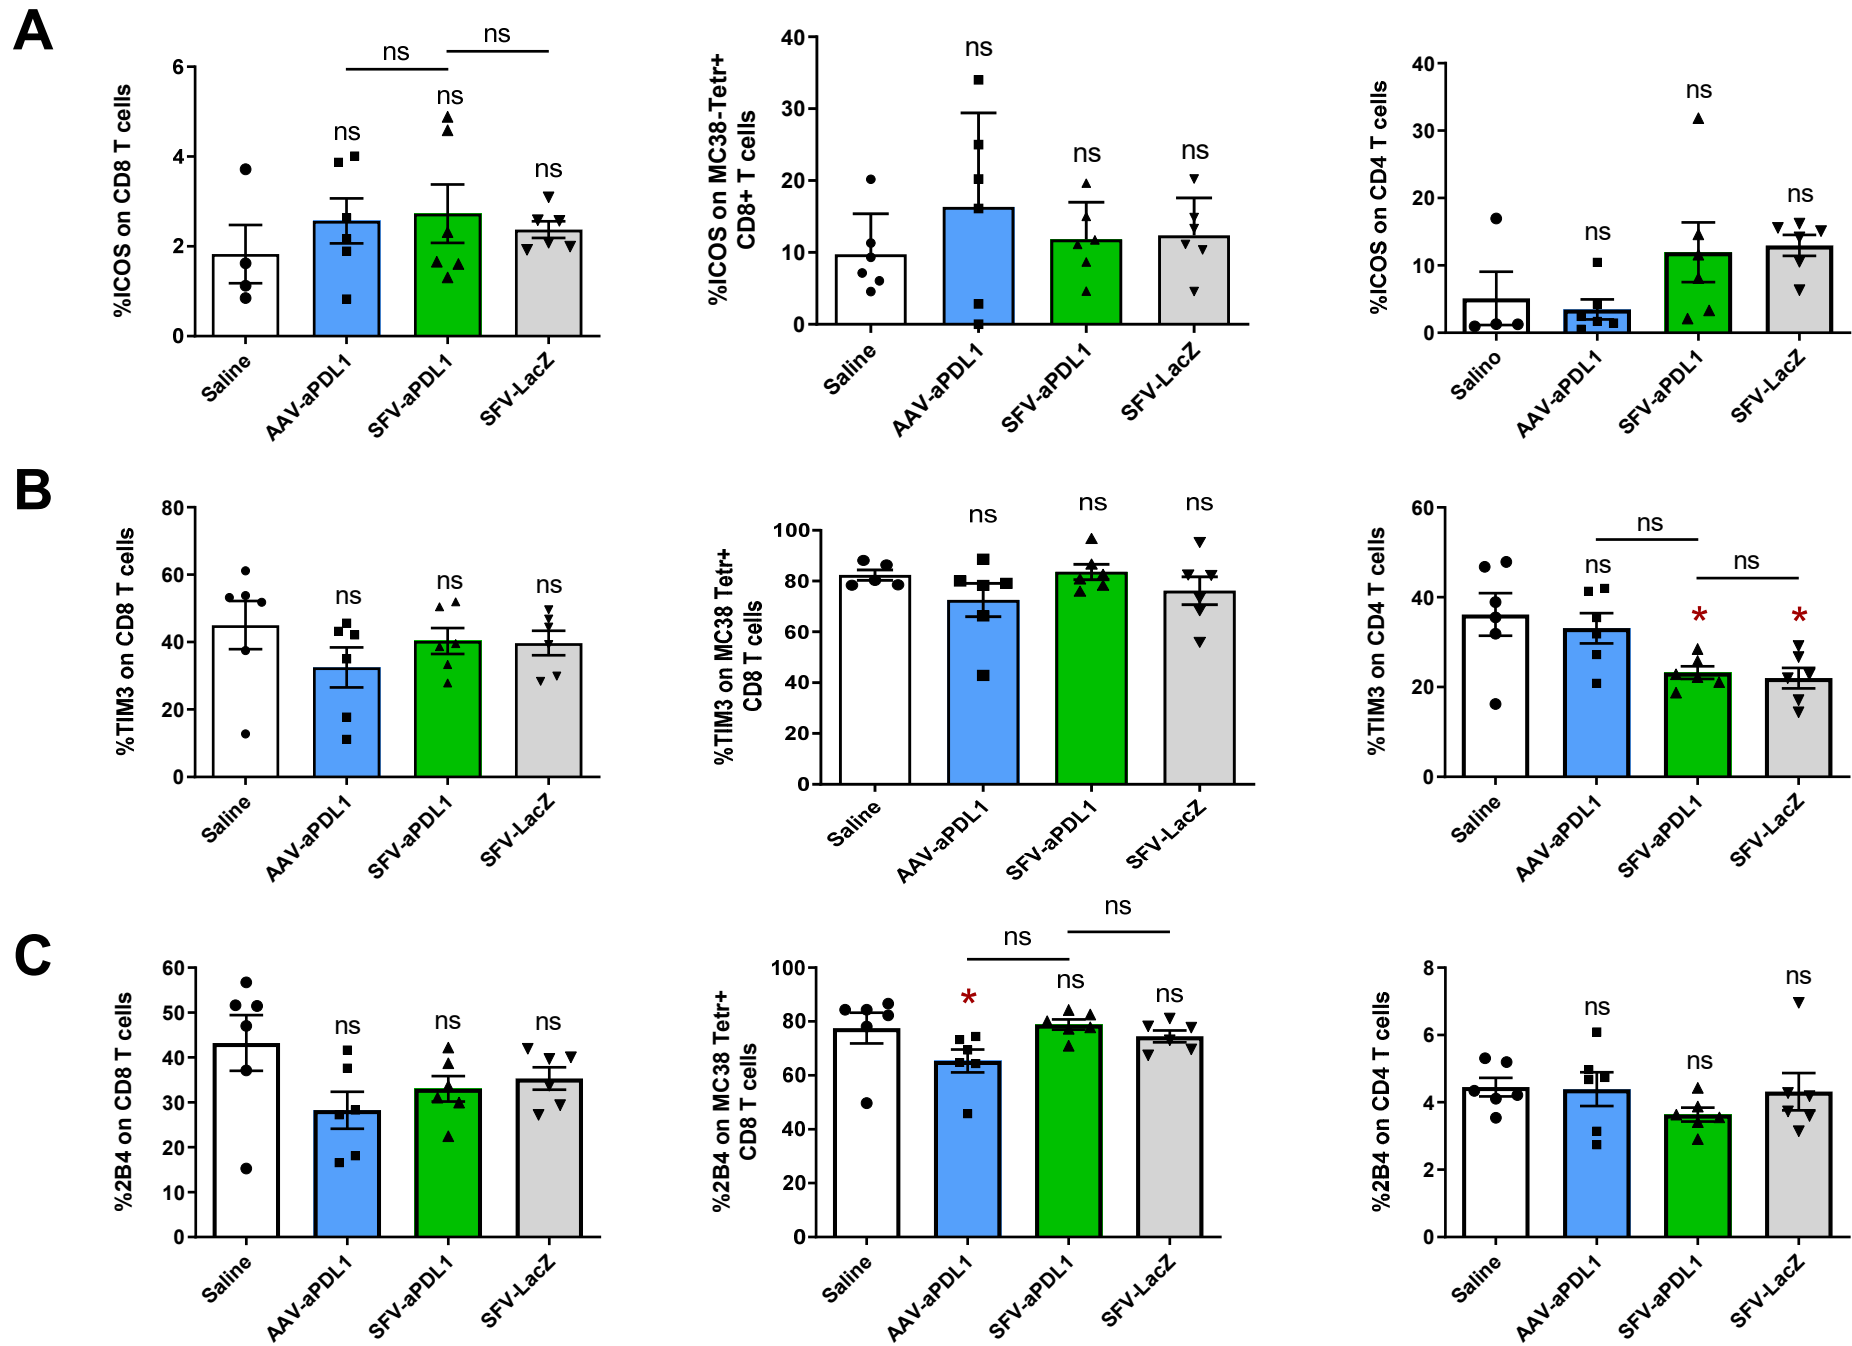

Supplementary Figure S6



**A**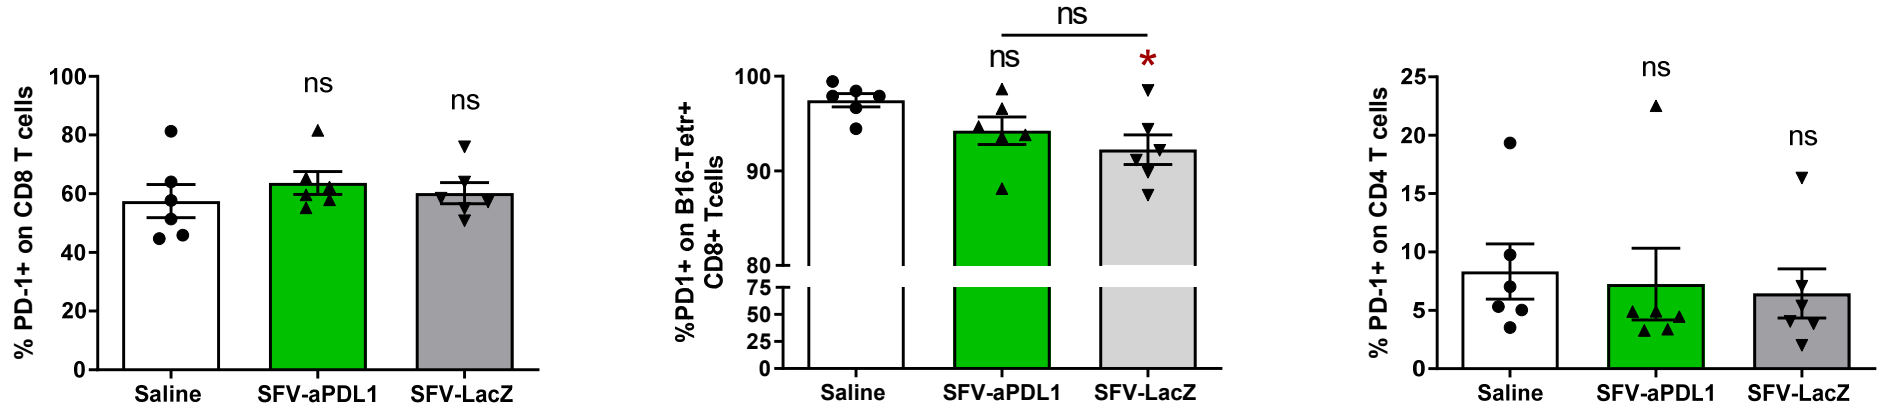**B**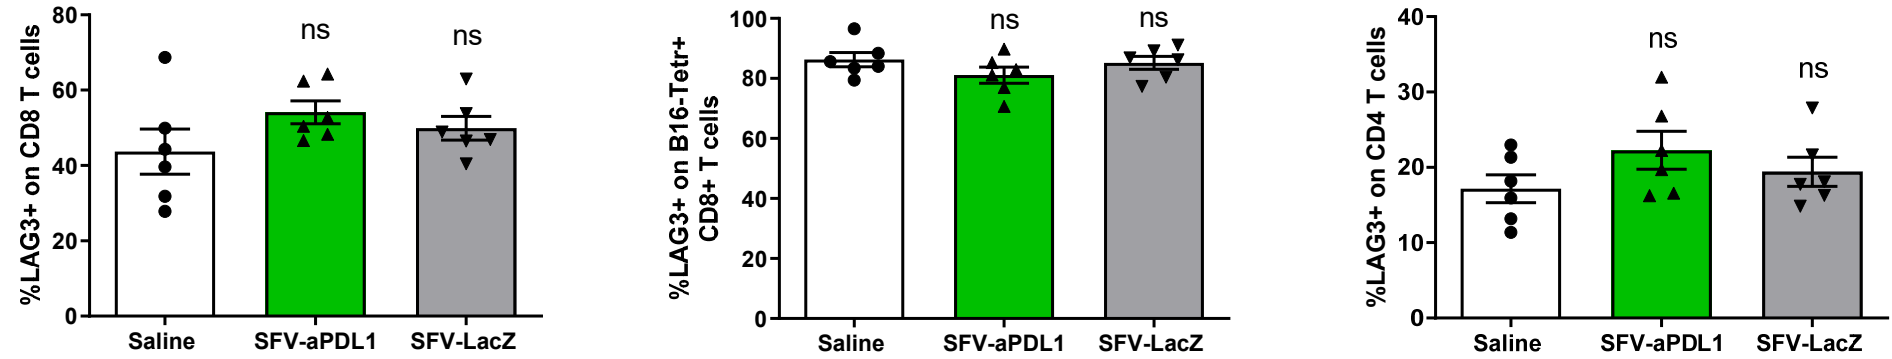**C**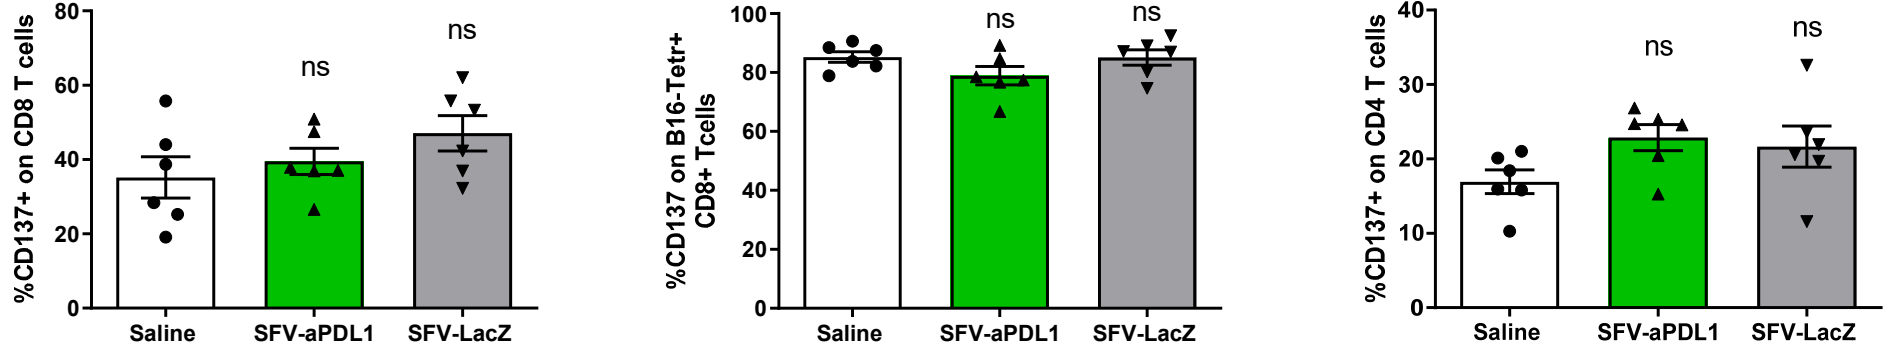

**A**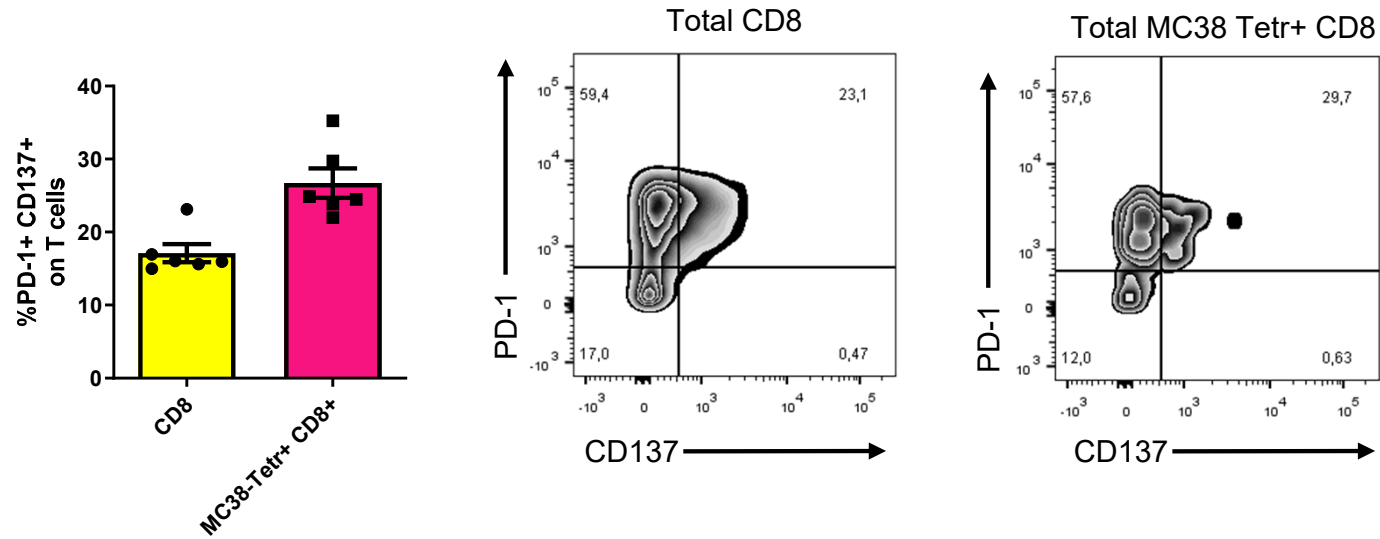**B**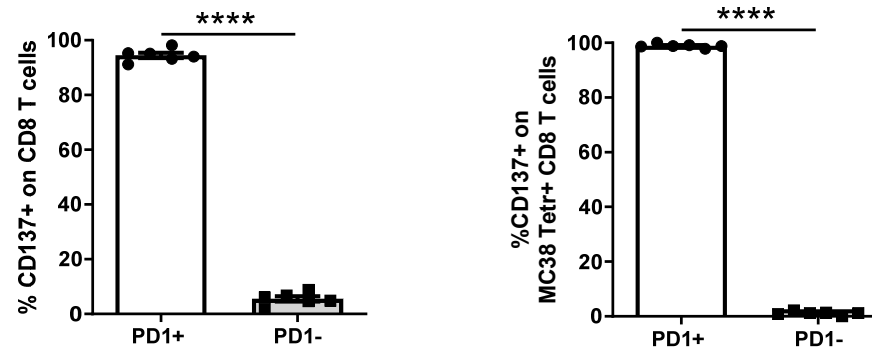

**A**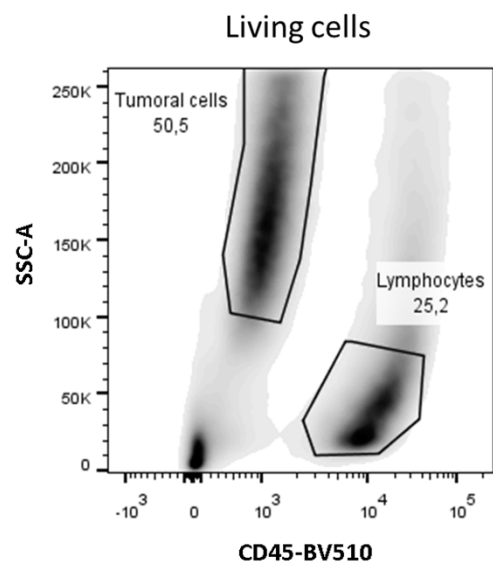**B**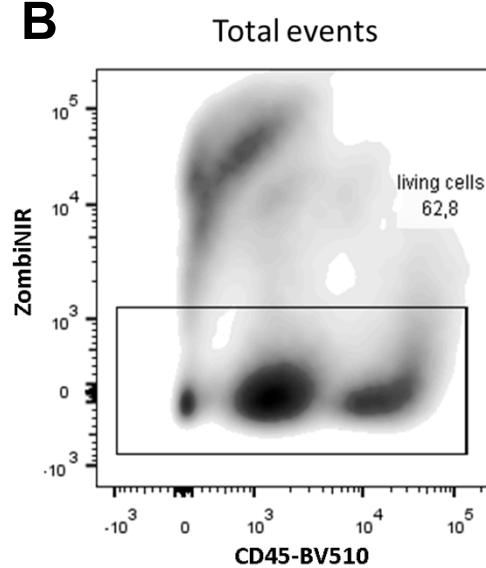**C**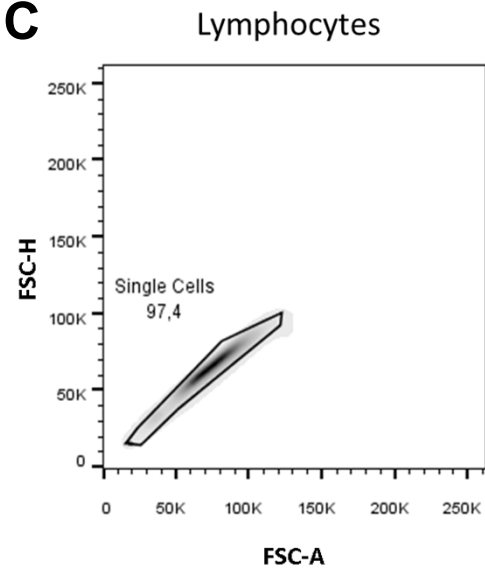**D**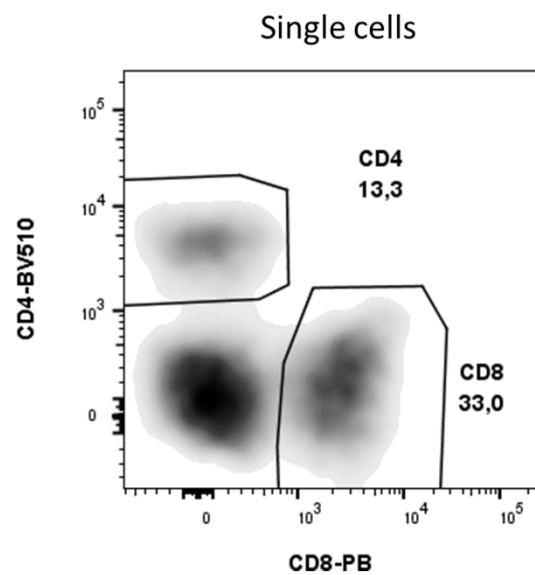**E**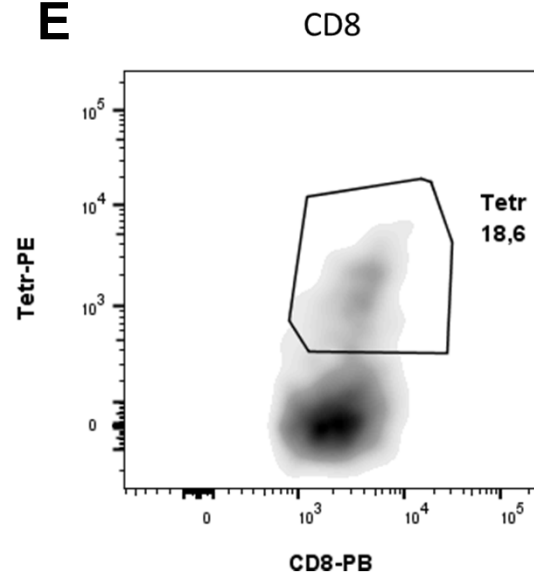

Supplement: mmc1.pdf [file mmc1.pdf]
